# Supplementary material for: Dimorphic neural network architecture prioritizes sexual-related behaviors in male Caenorhabditis elegans
Source: eLife. 2026 Apr 20;14:RP102309. doi: 10.7554/eLife.102309 (PMC13095209; doi:10.7554/eLife.102309)
Supplement: Supplementary file 1. [file elife-102309-supp1.xlsx]

## Sheet: male neuron connections
			PHARYNX														SENSORY NEURONS
			1														6											5		4							3									2			1
			I1	I2	I3	I4	I5	I6	M1	M2	M3	M4	M5	MC	MI	NSM	ASI	ASJ	AWA	ASG	AWB	ASEL	ASER	ADF	AFD	AWC	ASK	ASH	ADL	BAG	URX	ALN	PLN	SDQ	AQR	PQR	ALM	AVM	PVM	PLM	FLP	DVA	PVD	ADE	PDE	PHA	PHB	PHC	IL2_DV
PHARYNX	1	I1		19	5		4	1	1	7	19			16	3	11
		I2	6	6		34	4	5	5	4	5	7		2		81
		I3	3				2	1	3	3	4	2		3	2	2
		I4		8			2			7	28	1			1	23
		I5	2	4	1	7			3	6	6	19	3		4	6
		I6	1	5	12						10	20				47
		M1	1	6	9	1	2					1	1		6	2
		M2		2	3	11	7				8	1		12	5	1
		M3	2							1		2				4
		M4				6	1	5		2	1	16	2	1
		M5					2		1			2	1
		MC	5	1						12
		MI	1		3	1			7	10	4			3		3
		NSM	5	4		4		5			49	13				9
SENSORY NEURONS	6	ASI															4			8					13	9	5
		ASJ																				1					14
		AWA															2				10	5		24	24				3
		ASG																				1
		AWB																						35
		ASEL																1								18	4
		ASER																							2				2
		ADF																	2	2	8				5
		AFD																	2					3	5
		AWC																				4					2
		ASK															1										4	7
	5	ASH																						12			3		3
		ADL																		10			4				1	15	14
	4	BAG																					1		1
		URX																																															3
		ALN
		PLN
		SDQ																																14			13				20	25
		AQR																												3							2					1		4
		PQR																																												1
	3	ALM																																				60
		AVM																																			60
		PVM																																					4			9			24
		PLM																																								28			74			1
		FLP																																4	1						10
		DVA																																	5				1			2		1	17
		PVD																																								5	15		1
		ADE																																								2		6
		PDE																																					22	11		60	1		29
	2	PHA																																		1						11				46	102	34
		PHB																																		1										98	25	21
		PHC																																						1								40
	1	IL2_DV																													3
		IL2_LR																							1
		CEP																								1					14																		9
		URY
		OLL															2
		OLQ																																															8
		IL1																																															2
INTERNEURONS	4	AIN																		1					24					8
		AIM															1	3		13							18				1
		RIH																						3						2											8	1		1					1
		URB
		RIR																						2						15												2
	3	AIY																	3		8		1	2	13
		AIA															2		17	5			4	4		25	2	1	12
		AUA																			3			20						3	1
		AIZ																	11					10					8													1
		RIS
		ALA																													1												650
		PVQ																									21	5																		70	4	1
		ADA																						2
		RIF
		BDU																																			4			46
		PVR																																			5		1	26		2
		AVF																									2									19						4	1			7
		AVH																			4			6				2	3									1				2				35	1
		PVP																											1						11	15						14	1
		LUA																																		4				3
		PVN																															2			8				1			6					4
		AVG																																		24						12	1			5
		DVB
	2	RIB																												10
		RIG																												5		4	7											1
		RMG																			1						3		2		5	4	1				2
		AIB																		4																					5	1
		RIC																										9
		SAA
		AVK																																	2				2			16			6
		DVC																																									2
		AVJ																																		1	2	5
		PVT																																		5
		AVD																																		4	2	27		5
		AVL
		PVW																																		4
	1	RIA
		RIM
		AVE
		RMF																													1
		RID
		AVB																																		2						28
		AVA																																		19				6			10			2
		PVC																																						7		7	6		3	21
		RIP																						1
MOTOR NEURONS	HEAD MOTOR NEURONS	URA																																															2
		RME_LR
		RME_DV
		RMD_DV
		RMD																													5
		RIV																																30							1
		RMH
	SUBLATERAL MOTOR NEURONS	SAB
		SMD
		SMB																														1	18	36
		SIB
		SIA																																8
	VENTRAL CORD MOTOR NEURONS	DA																																		5						1
		PDA																																								10
		DB																																					2			4
		AS
		PDB																																								1				2	19	1
		DD
		VA																																						7		2	1		1			1
		VB																																		2				4		6			17
		VD																																					1			6	1		6	14
		CAN																																									200
SEX-SPECIFIC CELLS	HEAD	CEM_DV																								4				9	4																		2
		MCM																																	3		3
	SENSORY NEURONS	R1A																																						1					1			1
		R1B																																		4						25	5		3	2
		R2A																																						1								8
		R2B																																						2								204
		R3A
		R3B																																		20										12	14	25
		R4A
		R4B																																														70
		R5A
		R5B																																												8		1
		R6A																															1							1
		R6B																																									2				1
		R7A																																														3
		R7B																															1			3										4
		R8A																																														131
		R8B																																		1												102
		R9A																																														75
		R9B																														2	4			6										5	16
		PHD
		HOA																																													6	226
		HOB																																														43
		PCA																																												1		10
		PCB																																													1	57
		PCC
		SPC																																														3
		SPD
		SPV																																		6							1					1
	INTERNEURONS	PVV																																									1			2
		PVX																																		72												3
		PVY																																													3
		PVZ																																									3
		DVE
		DVF
		DX																																												2	2
		EF																8									3																			3	8
		PDC																																								3
		PGA
		CA																																					3								2	7
		CP
[truncated: 114 more columns]

## Sheet: herm neuron connections
			PHARYNX														SENSORY NEURONS
			1														6											5		4							3									2			1
			I1	I2	I3	I4	I5	I6	M1	M2	M3	M4	M5	MC	MI	NSM	ASI	ASJ	AWA	ASG	AWB	ASEL	ASER	ADF	AFD	AWC	ASK	ASH	ADL	BAG	URX	ALN	PLN	SDQ	AQR	PQR	ALM	AVM	PVM	PLM	FLP	DVA	PVD	ADE	PDE	PHA	PHB	PHC	IL2_DV
PHARYNX	1	I1		19	5		4	1	1	7	19			16	3	11
		I2	6	6		34	4	5	5	4	5	7		2		81
		I3	3				2	1	3	3	4	2		3	2	2
		I4		8			2			7	28	1			1	23
		I5	2	4	1	7			3	6	6	19	3		4	6
		I6	1	5	12						10	20				47
		M1	1	6	9	1	2					1	1		6	2
		M2		2	3	11	7				7	1		12	5	1
		M3	2									2				4
		M4				6	1	5		2	1	15		1
		M5					2		1
		MC	5	1						12
		MI	1		3	1			7	10	4			3		3
		NSM	5	4		4		5			49	13				9
SENSORY NEURONS	6	ASI															3		3	10		2	10	1		14	3	2	1
		ASJ																7									25
		AWA															2		2	2	12	7	5	12	30			2	1
		ASG															4				1	3	6	1		2	2		1
		AWB																	2	2	3	1	2	33		1		4
		ASEL																1		3	1		2	1	11	30
		ASER																	1	3	1	3			6	2	1	2	5
		ADF																	4	1	7			1	10	4		7	1	6	11
		AFD																			4	10	6	8	3	3		4
		AWC															5			6		11	6	2	5	28		1
		ASK																1	2	1			5				11	20	4
	5	ASH																	1		1			10	4		21	9	19		2
		ADL																	2	3	3	1	14			9	1	10	9		8
	4	BAG																						1						5	1				3
		URX															1				2			5				1	3	2	3						1
		ALN																																										3
		PLN																																						1						7	1	2
		SDQ																											1					6			4				3	13
		AQR																												13	5											6
		PQR																																													2
	3	ALM																																4			1	23
		AVM																																			23							4
		PVM																																				2	7			4		1	36
		PLM																															1									28			74
		FLP																																1							22	7		35
		DVA																													1			2	6				1						11
		PVD																																								5	15		1
		ADE															1														2	3					1		1		13			10
		PDE																																					23	11		17	1		29
	2	PHA																															7									8				31	28	2
		PHB																															1														24	5
		PHC																															2									34				5	1	8
	1	IL2_DV																											1	1	1																		2
		IL2_LR																1													9													13
		CEP																		2					2				3		4						2												5
		URY																								1					3
		OLL																																										7
		OLQ
		IL1																													1													3					9
INTERNEURONS	4	AIN															12			4		2	3		22	2				17	4													6
		AIM																7		15				2			11				6						1
		RIH																						4						7											1								9
		URB																						1	11				2		42													1
		RIR																			1			5	1			2		10	15				2							9
	3	AIY															1		15	2	1	2	5	1	5	8				1
		AIA															8	5	8	9	1	5	15	6		21	13	2	11
		AUA																			7			1		1				4	9											2
		AIZ																	7	4		4	2	3	1	4		8														4
		RIS
		ALA																6									1																650
		PVQ																10	5				3				51																	2			3
		ADA																						9				7	2		4
		RIF																			2							6	1		3						5
		BDU																																2			5			46				10
		PVR																														16		5			8	4	2	18		17			18	2
		AVF																										1															1		1
		AVH																			4			5			19	3	3						1							1				3	15
		PVP																						2				2			1				115	26						1	1			22	1
		LUA																																		7				17							2
		PVN																													2					14	2						8
		AVG																																									1			8		1
		DVB																																														2
	2	RIB																												11
		RIG																						1	1				2	8	9	9			3							5		1
		RMG																			2						1	8	4		14	5					4							2
		AIB																							4	1	4	4	1					1	1						2	1
		RIC																			4							9	2		1
		SAA															1															1	1	1								1
		AVK																																	9			2	3			19		4	5
		DVC																																								1	2
		AVJ																										1								7	3	1			2			1			1	1
		PVT																																								8					1
		AVD																											2							8	2	8		5	16
		AVL
		PVW
	1	RIA																						3						2	2				4
		RIM
		AVE																							1			1		1	1						1
		RMF																												1
		RID																																							1
		AVB																																2	3							16
		AVA																										2								17				6			10		6		1	5
		PVC																										2	2						2	2				12	2	11	6		7		3	5
		RIP	4																					6						9
MOTOR NEURONS	HEAD MOTOR NEURONS	URA																																															8
		RME_LR																																										1
		RME_DV																																															1
		RMD_DV																							1												2							1					1
		RMD																													1													3
		RIV																																8
		RMH																													1
	SUBLATERAL MOTOR NEURONS	SAB
		SMD																2		3				2								15	12
		SMB																						1					2			9	10	36			1
		SIB																														1		2										2
		SIA																														4	20	10			1				1	2		1
	VENTRAL CORD MOTOR NEURONS	DA																																							29	4	2					7
		PDA																																								1				1
		DB																																					2		1	6	1
		AS																																							1	1	2
		PDB
		DD																																							1
		VA																															2									1	1					2
		VB																																								1			12
		VD																																		2			1	4		3	1		10		3
		CAN																																									200
SEX-SPECIFIC CELLS		HSN																2	3		10						12	8	2
		VC
[truncated: 75 more columns]
