# Supplementary material for: Dimorphic neural network architecture prioritizes sexual-related behaviors in male Caenorhabditis elegans
Source: eLife. 2026 Apr 20;14:RP102309. doi: 10.7554/eLife.102309 (PMC13095209; doi:10.7554/eLife.102309)
Supplement: Supplementary file 5. [file elife-102309-supp5.xlsx]

## Sheet: Table S1
Table S1: plasmids constructed by this study.
plasmid id	Fragment No.	DNA fragment for Gibson assembly	primer set	length (kb)	PCR template	Purpose
YW399	1	nmr1 sense	a91/a92	1.1	cDNA	AVA knockdown of nmr1
	2	Pnmr1s fragment with plasmid backbone	ypr330/a93	4.2	plasmid WY085
YW400	1	nmr1 antisense	a94/a95	1.1	cDNA
	2	Pflp18 fragment with plasmid backbone	ypr330/ypr300	4.8	plasmid XZ046
YW401	1	nmr2 sense	a98/a99	1.6	cDNA	AVA knockdown of nmr2
	2	Pnmr1s fragment with plasmid backbone	ypr330/a93	4.2	plasmid WY085
YW402	1	nmr2 antisense	a96/a97	1.6	cDNA
	2	Pflp18 fragment with plasmid backbone	ypr330/ypr300	4.8	plasmid XZ046
YW406	1	glr2 sense	a104/a105	1.3	cDNA	AVA knockdown of glr2
	2	Pnmr1s fragment with plasmid backbone	ypr330/a93	4.2	plasmid WY085
YW405	1	glr2 antisense	a106/a107	1.3	cDNA
	2	Pflp18 fragment with plasmid backbone	ypr330/ypr300	4.8	plasmid XZ046
YW474	1	ser3 sense	a279/a280	1	genomic DNA	AVA knockdown of ser3
	2	Pnmr1s fragment with plasmid backbone	ypr330/a93	4.2	plasmid WY085
YW475	1	ser3 antisense	a277/a278	1	genomic DNA
	2	Pflp18 fragment with plasmid backbone	ypr330/ypr300	4.8	plasmid XZ046
YW495	1	ser6 sense	a319/a320	0.9	cDNA	AVA knockdown of ser6
	2	Pnmr1s fragment with plasmid backbone	ypr330/a93	4.2	plasmid WY085
YW496	1	ser6 antisense	a321/a322	0.9	cDNA
	2	Pflp18 fragment with plasmid backbone	ypr330/ypr300	4.8	plasmid XZ046

## Sheet: Table S2
Table S2: Primers used for PCR
primer	DNA sequence
a91	TTAGTTTTGTTACAGATATGTTCCGAATATCAGTTATATTTATTTGG
a92	TTGAAGAGTAATTGGACCATATTTCCAACTTGTTTCCTCTC
a93	ATCTGTAACAAAACTAAAGTTTGTCG
a94	GAGGACCCTTGGCTAGCCATATTTCCAACTTGTTTCCTCTC
a95	TTGAAGAGTAATTGGACATGTTCCGAATATCAGTTATATTTATTTGG
a96	GAGGACCCTTGGCTAGCCTTTCTGCTGATACTGCAGC
a97	TTGAAGAGTAATTGGACTATCCAATGCAATGTTTGCTCC
a98	TTAGTTTTGTTACAGATTATCCAATGCAATGTTTGCTCC
a99	TTGAAGAGTAATTGGACCTTTCTGCTGATACTGCAGC
a104	TTAGTTTTGTTACAGATAAAAACACGTGCAGAATTCCATG
a105	TTGAAGAGTAATTGGACCTAATGTGAGAAAAGCTGCAAG
a106	GAGGACCCTTGGCTAGCCTAATGTGAGAAAAGCTGCAAG
a107	TTGAAGAGTAATTGGACAAAAACACGTGCAGAATTCCATG
a277	GAGGACCCTTGGCTAGCTTATACGGCTTGTTTGGCGTA
a278	TTGAAGAGTAATTGGACATGGAATGGATGAGAAATACGTT
a279	TTAGTTTTGTTACAGATATGGAATGGATGAGAAATACGTT
a280	TTGAAGAGTAATTGGACTTATACGGCTTGTTTGGCGTA
a319	TTAGTTTTGTTACAGATATGATTTTGCTATCACTGACGC
a320	TTGAAGAGTAATTGGACTGTGTGATGTGATTGATGATGTTG
a321	GAGGACCCTTGGCTAGCTGTGTGATGTGATTGATGATGTTG
a322	TTGAAGAGTAATTGGACATGATTTTGCTATCACTGACGCT
ypr330	GTCCAATTACTCTTCAACATC
ypr300	GCTAGCCAAGGGTCCTCCTGAA
